# Supplementary material
Source: PubMed Central journal article supplement (PMC3805669)

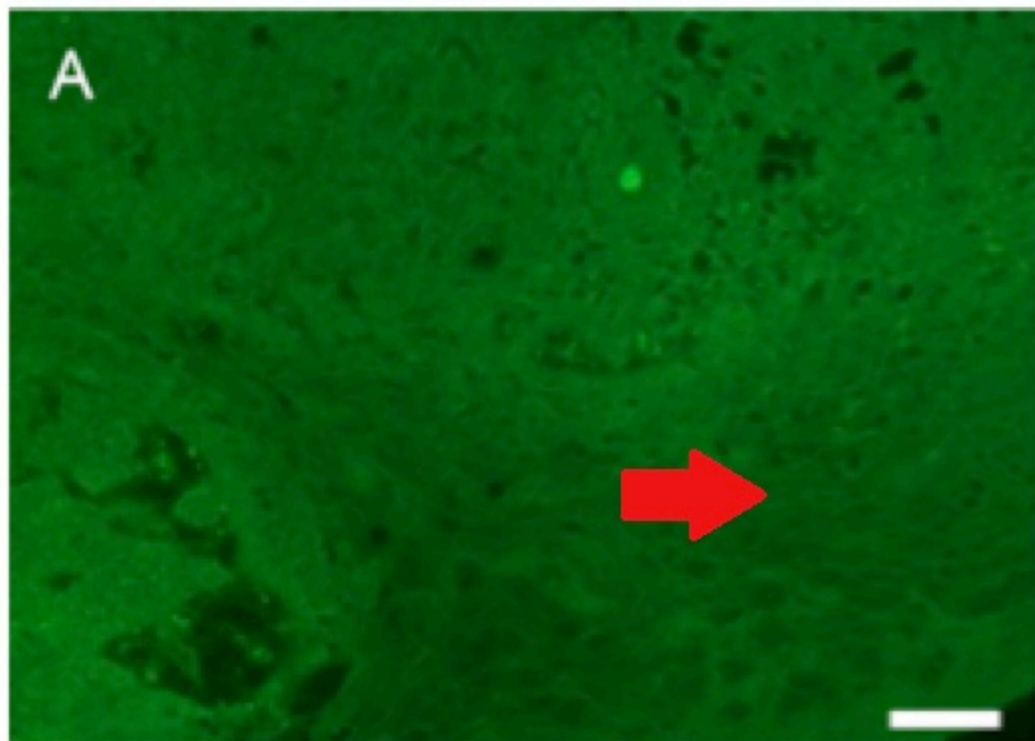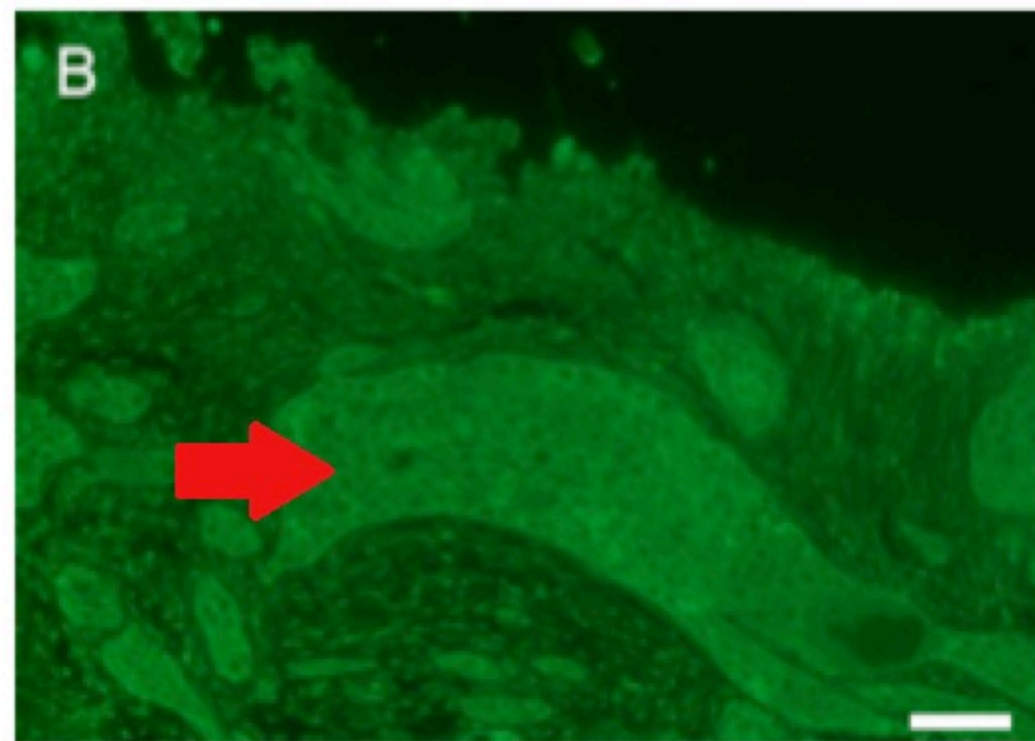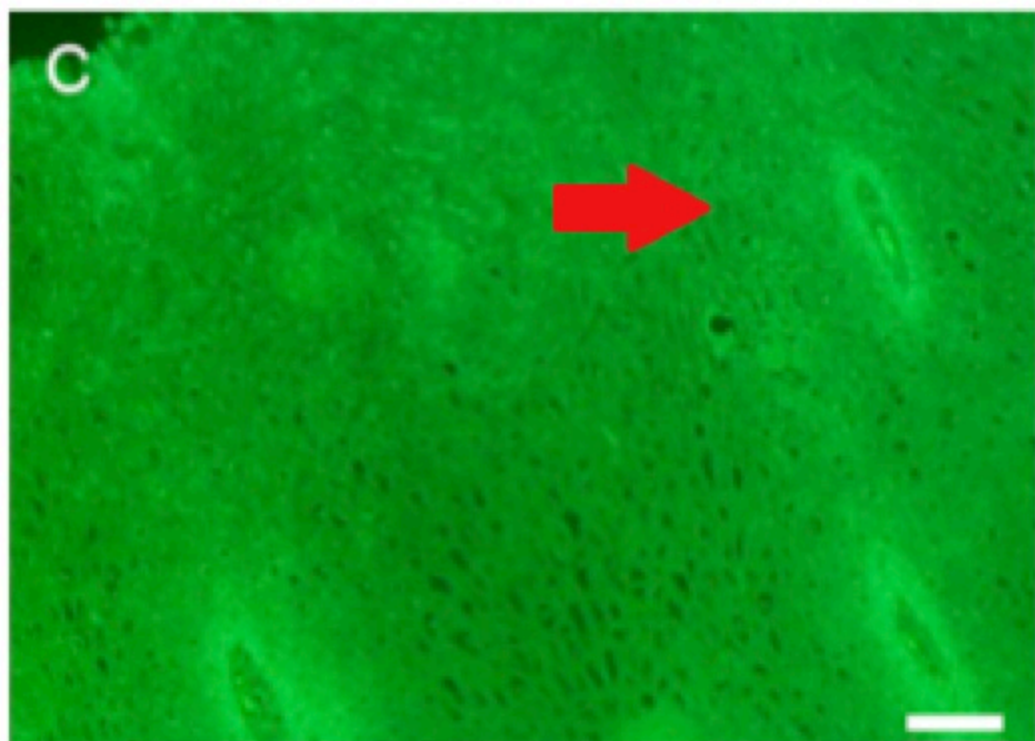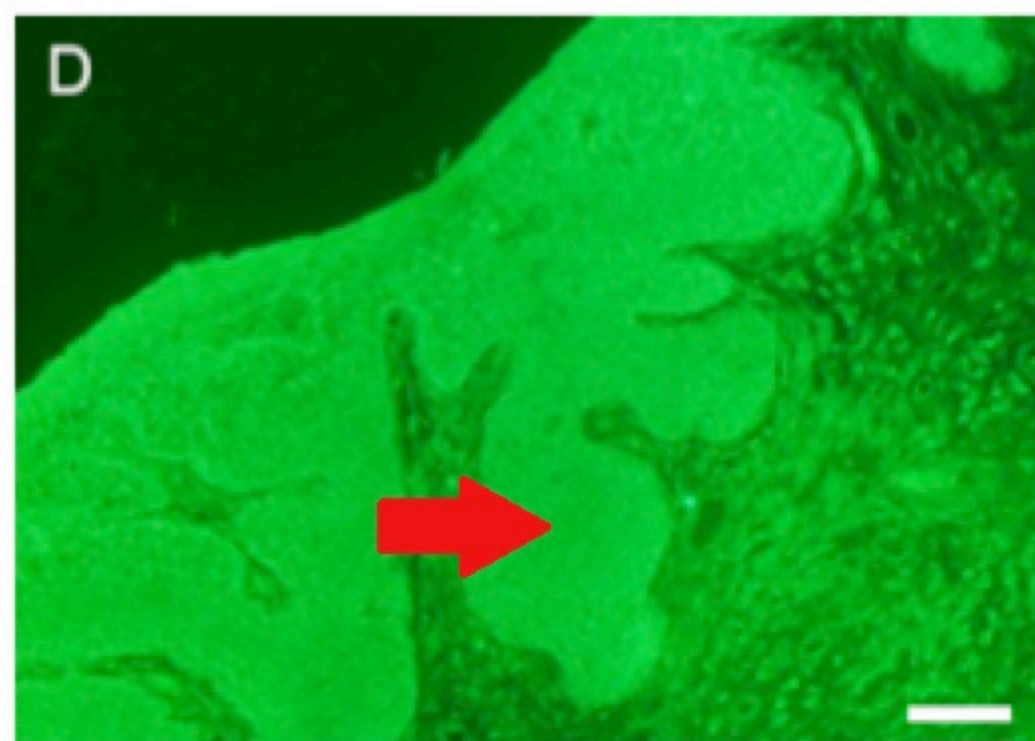

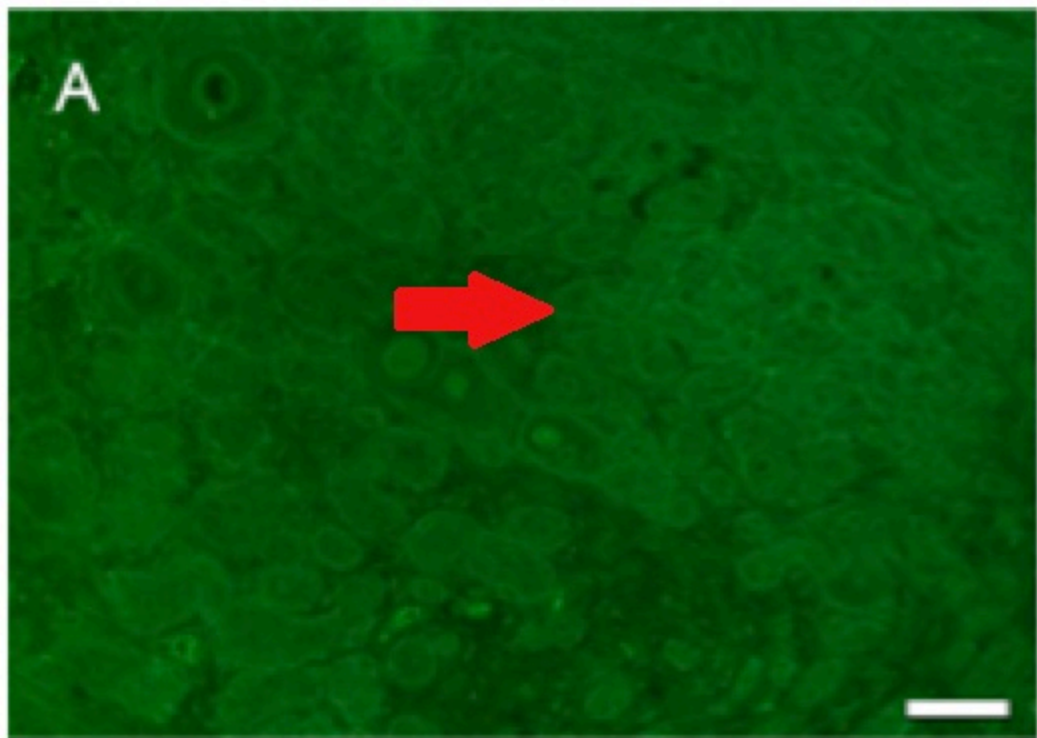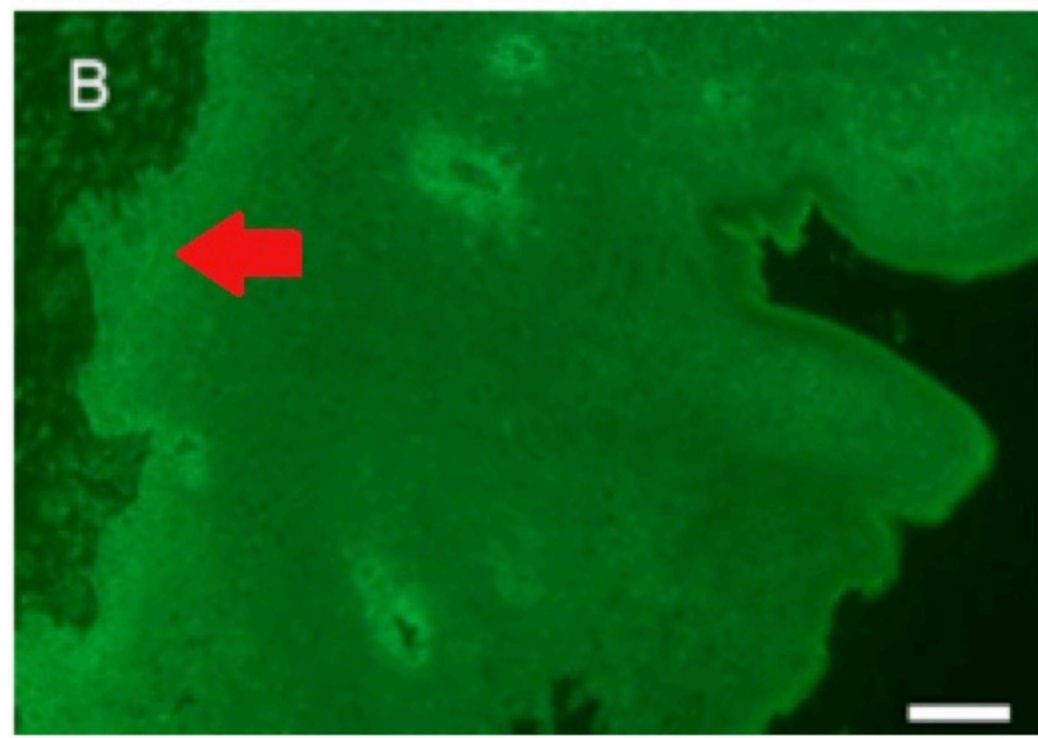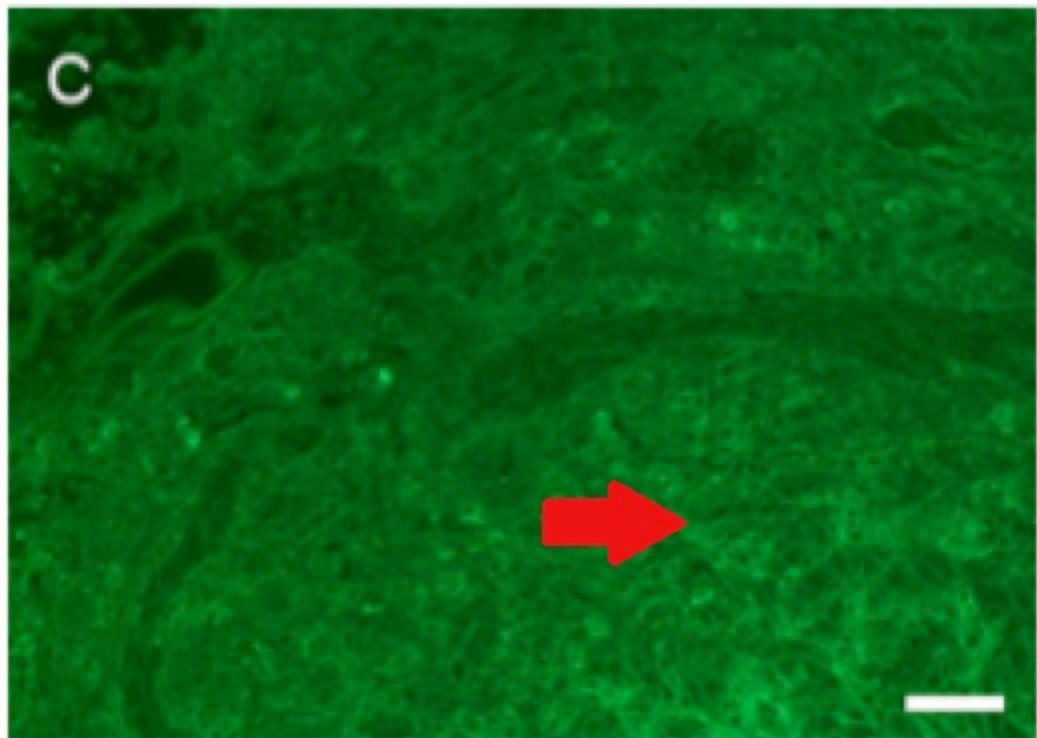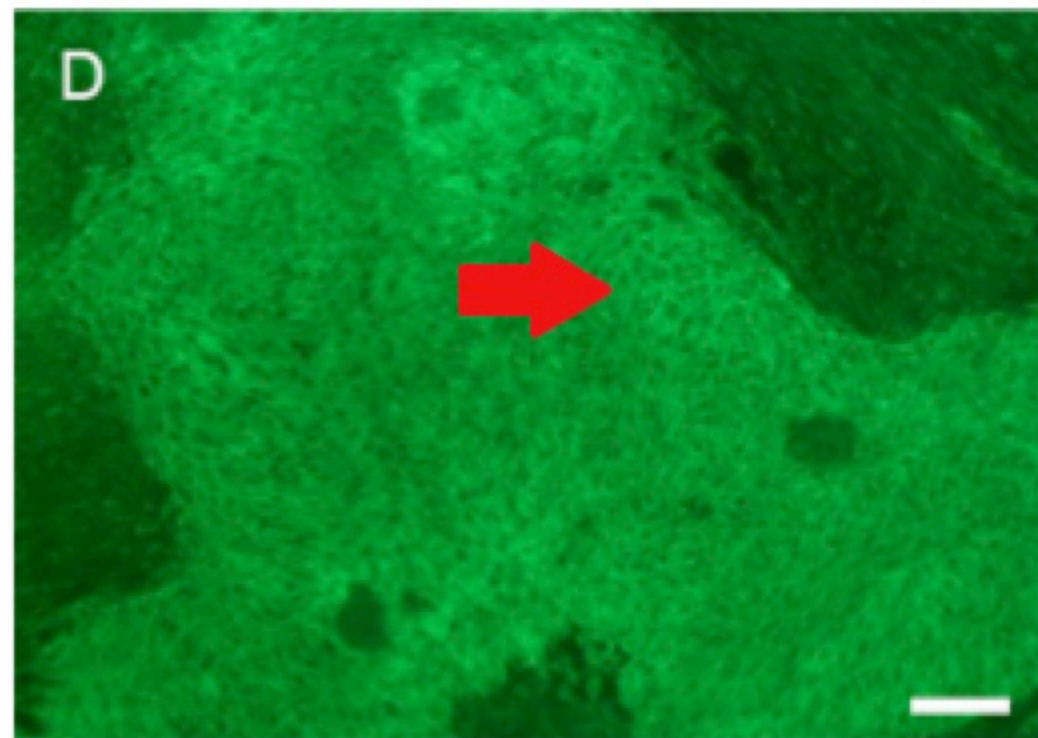

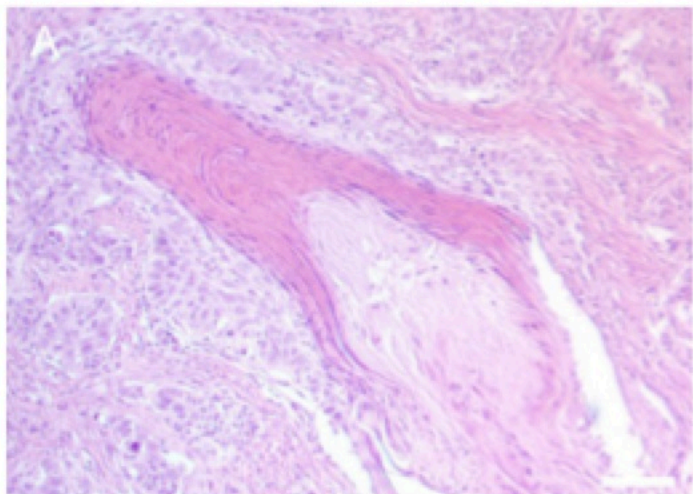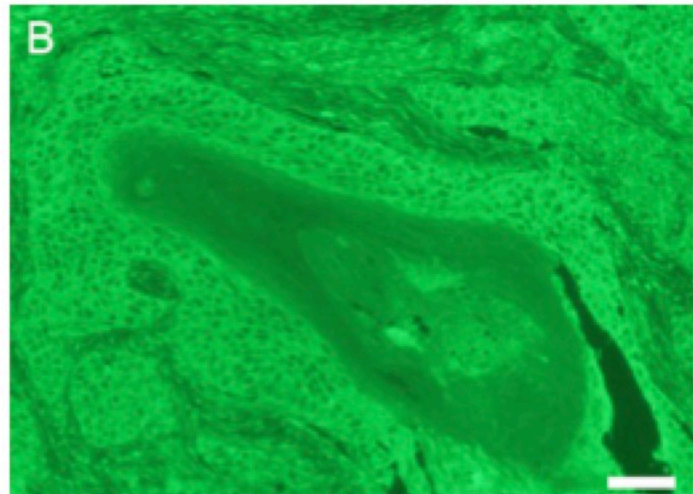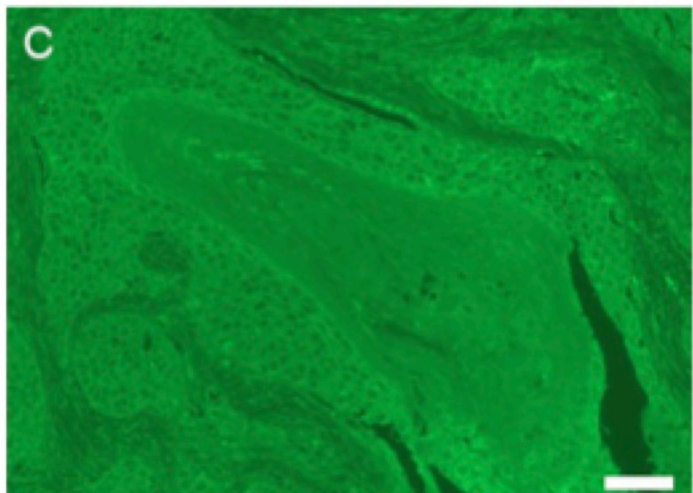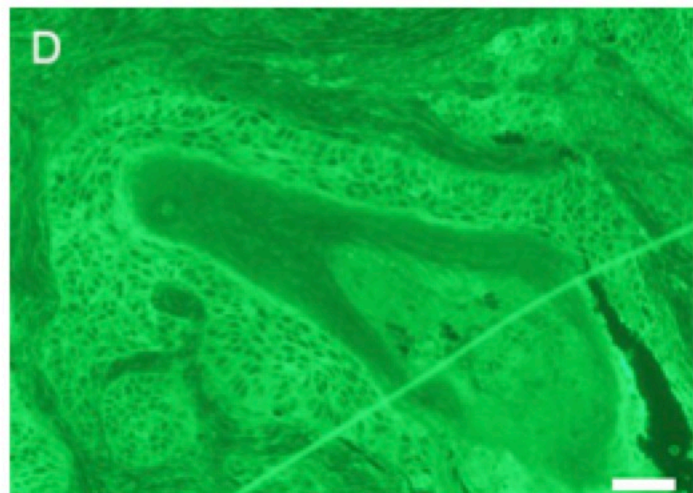

Supplement: NIHMS492830-supplement-Supp_Figure_S1-S3.pdf [file NIHMS492830-supplement-Supp_Figure_S1-S3.pdf]
